# Supplementary material
Source: PubMed Central journal article supplement (PMC3923381)
Supplement: NIHMS501113-supplement-Supp_Figure_S1-S5___TableS1-S3.pdf [file NIHMS501113-supplement-Supp_Figure_S1-S5___TableS1-S3.pdf]

**Supplemental Material for:**

**Structure-function analysis of the LytM domain of EnvC, an activator of cell wall remodeling at the *Escherichia coli* division site**

Nick T. Peters<sup>1†</sup>, Cécile Morlot<sup>2-4†\*</sup>, Desirée C. Yang<sup>1</sup>, Tsuyoshi Uehara<sup>1</sup>, Thierry Vernet<sup>2</sup>, and Thomas G. Bernhardt<sup>1\*</sup>

<sup>1</sup>Department of Microbiology and Immunobiology  
Harvard Medical School  
200 Longwood Avenue  
Boston, MA 02115

<sup>2</sup>CEA, <sup>3</sup>CNRS and <sup>4</sup>Université Joseph Fourier-Grenoble1, Pneumococcus Group, Institut de Biologie Structurale Jean-Pierre Ebel, 41 Rue Jules Horowitz, 38027 Grenoble cedex 1, France.

<sup>†</sup>These authors contributed equally to this work  
<sup>\*</sup>To whom correspondence should be addressed.

Thomas G. Bernhardt, Ph.D.  
Harvard Medical School  
Department of Microbiology and Immunobiology  
HIM Building, Room 1026  
4 Blackfan Circle  
Boston, Massachusetts 02115  
Phone: (617) 432-6971  
Fax: (617) 738-7664  
e-mail: [thomas\\_bernhardt@hms.harvard.edu](mailto:thomas_bernhardt@hms.harvard.edu)

Cécile Morlot  
Institut de Biologie Structurale Jean-Pierre Ebel  
Pneumococcus Group  
41 rue Jules Horowitz  
38027 Grenoble Cedex 1, France  
e-mail: [cecile.morlot@ibs.fr](mailto:cecile.morlot@ibs.fr)

## Supplemental Methods and Materials

### Plasmid construction

Plasmids used in this study are listed below. In all cases PCR was performed using KOD polymerase (Novagen) according to the manufacturer's instructions. Unless otherwise indicated, MG1655 chromosomal DNA was used as the template. Restriction sites for use in plasmid constructions are bold, italicized and underlined in the primer sequences given below. Plasmid DNA and PCR fragments were purified using the Qiaprep spin miniprep kit (Qiagen) or the Qiaquick PCR purification kit (Qiagen), respectively.

#### pBD4:

The plasmid pBD4 [*bla* P<sub>lac</sub>::<sup>ss</sup>*dsbA*-<sup>sf</sup>*gfp*-<sup>lyt</sup>*envC*(Y350A)] was constructed as follows. The primer 5'-CTCAACCACCACCAGAC**CGGCGCCTTGCAGCCAGTCAGCCAG**-3' was used for single oligonucleotide mutagenesis with pTU115 [*bla* P<sub>lac</sub>::<sup>ss</sup>*dsbA*-<sup>sf</sup>*gfp*-<sup>lyt</sup>*envC*] (Uehara *et al.*, 2010).

#### pDY280:

The plasmid pDY280 [*bla* P<sub>T7</sub>::*H-SUMO*-<sup>lyt</sup>*envC*] was constructed by digesting the <sup>lyt</sup>*envC* fragment from pNP33 using *Bam*HI and *Hind*III and ligating the resulting fragment to pTD68 [*bla* P<sub>T7</sub>::*H-SUMO*] (Uehara *et al.*, 2010) digested with the same enzymes.

#### pDY281:

The plasmid pDY281 [*bla* P<sub>T7</sub>::*H-SUMO*-lyt*envC*(K321E)] was constructed by digesting the lyt*envC*(K321E) fragment from pNP34 using *Bam*HI and *Hind*III and ligating the resulting fragment to pTD68 [*bla* P<sub>T7</sub>::*H-SUMO*] (Uehara *et al.*, 2010) digested with the same enzymes.

pDY282:

The plasmid pDY282 [*bla* P<sub>T7</sub>::*H-SUMO*-lyt*envC*(R405H)] was constructed by digesting the lyt*envC*(R405H) fragment from pNP35 using *Bam*HI and *Hind*III and ligating the resulting fragment to pTD68 [*bla* P<sub>T7</sub>::*H-SUMO*] (Uehara *et al.*, 2010) digested with the same enzymes.

pDY283:

The plasmid pDY283 [*bla* P<sub>T7</sub>::*H-SUMO*-lyt*envC*(Y350A)] was constructed by digesting the lyt*envC*(Y350A) fragment from pNP36 using *Bam*HI and *Hind*III and ligating the resulting fragment to pTD68 [*bla* P<sub>T7</sub>::*H-SUMO*] (Uehara *et al.*, 2010) digested with the same enzymes.

pDY286:

The plasmid pDY286 [*bla* P<sub>T7</sub>::*H-SUMO*-lyt*envC*(V353A)] was constructed by digesting the lyt*envC*(V353A) fragment from pNP39 using *Bam*HI and *Hind*III and ligating the resulting fragment to pTD68 [*bla* P<sub>T7</sub>::*H-SUMO*] (Uehara *et al.*, 2010) digested with the same enzymes.

pFC2:

The plasmid pFC2 [*bla* P<sub>lac</sub>::<sup>ss</sup>*dsbA*-<sup>sf</sup>*gfp*-lyt*envC*(K321E)] was constructed as follows. The primer 5'-GAAGCACCGATAACCATAACCTTCCCAGCGTAATTCACCCTGTA-3' was used for single oligonucleotide mutagenesis on pTU115 [*bla* P<sub>lac</sub>::<sup>ss</sup>*dsbA*-<sup>sf</sup>*gfp*-lyt*envC*] (Uehara *et al.*, 2010).

pNP31:

The plasmid pNP31 [*tetA* P<sub>lac</sub>::*fl**envC*] was constructed as follows. The *envC* containing *Xba*I/*Hind*III fragment from pTD25 [*cat* P<sub>ara</sub>::*fl**envC*] was used to replace the corresponding fragment of pMM60 [*tetA* P<sub>lac</sub>::*ycfM*-*sf**gfp*] (Peters *et al.*, 2011).

pNP33:

The plasmid pNP33 [*bla* P<sub>lac</sub>::*ss**dsbA*-*sf**gfp*-*lyt**envC*] was constructed as follows. The primers 5'-GTCAGGATCCGGTACCGAAAGCGAAAAATCGCTGATG-3' and 5'-GCAT AAGCTTTATTATCTTCCCAACCACGGCTG-3' were used to amplify *lyt**envC* from pTU115 [*bla* P<sub>lac</sub>::*ss**dsbA*-*sf**gfp*-*lyt**envC*] and eliminate GTTTTGTTCATTTCGTCGTAACGTTCTTGCAATTTGCCGCTCTGTTGGCGCTCTCC, which was native *envC* sequence downstream of the stop codon. The resulting PCR product was purified and digested with *Bam*HI and *Hind*III and ligated into pTU115. pNP33 is identical to pTU115 except that it lacks chromosomal sequence downstream of the *envC* stop codon present in pTU115.

pNP34:

The plasmid pNP34 [*bla* P<sub>lac</sub>::*ss**dsbA*-*sf**gfp*-*lyt**envC*(K321E)] was constructed as follows. The primers 5'-GTCAGGATCCGGTACCGAAAGCGAAAAATCGCTGATG-3' and 5'-GCAT AAGCTTTATTATCTTCCCAACCACGGCTG-3' were used to amplify *lyt**envC* from pFC2 [*bla* P<sub>lac</sub>::*ss**dsbA*-*sf**gfp*-*lyt**envC*(K321E)] and eliminate



GTTTTGTTTCCATTTTCGTCGTAACGTTCTTGCATTTGCCGCTCTGTTGGCGCTCTCC, which was native *envC* sequence downstream of the stop codon. The resulting PCR product was purified and digested with *Bam*HI and *Hind*III and ligated into pTU115.

pNP35:

The plasmid pNP35 [*bla* P<sub>lac</sub>::<sup>ss</sup>*dsbA*-<sup>sf</sup>*gfp*-<sup>lyt</sup>*envC*(R405H)] was constructed as follows. The

primers 5'-GTCA**GGATCC**GGTACCGAAAGCGAAAAATCGCTGATG-3' and 5'-

GCAT**AAGCTT**TTATTATCTTCCCAACCACGGCTG-3' were used to amplify <sup>lyt</sup>*envC* from

pTU206-63 [*bla* P<sub>lac</sub>::<sup>ss</sup>*dsbA*-<sup>sf</sup>*gfp*-<sup>lyt</sup>*envC*(R405H)] and eliminate

GTTTTGTTTCCATTTTCGTCGTAACGTTCTTGCATTTGCCGCTCTGTTGGCGCTCTCC, which

was native *envC* sequence downstream of the stop codon. The resulting PCR product was

purified and digested with *Bam*HI and *Hind*III and ligated into pTU115.

pNP36:

The plasmid pNP36 [*bla* P<sub>lac</sub>::<sup>ss</sup>*dsbA*-<sup>sf</sup>*gfp*-<sup>lyt</sup>*envC*(Y350A)] was constructed as follows. The

primers 5'-GTCA**GGATCC**GGTACCGAAAGCGAAAAATCGCTGATG-3' and 5'-

GCAT**AAGCTT**TTATTATCTTCCCAACCACGGCTG-3' were used to amplify <sup>lyt</sup>*envC* from pBD4

[*bla* P<sub>lac</sub>::<sup>ss</sup>*dsbA*-<sup>sf</sup>*gfp*-<sup>lyt</sup>*envC*(Y350A)] and eliminate

GTTTTGTTTCCATTTTCGTCGTAACGTTCTTGCATTTGCCGCTCTGTTGGCGCTCTCC, which

was native *envC* sequence downstream of the stop codon. The resulting PCR product was

purified and digested with *Bam*HI and *Hind*III and ligated into pTU115.

pNP37:

The plasmid pNP37 [*bla* P<sub>lac</sub>::<sup>ss</sup>*dsbA*-<sup>sf</sup>*gfp*-<sup>lyt</sup>*envC*(N412K)] was constructed as follows. The primers 5'-GTCA**GGATCC**GGTACCGAAAGCGAAAAATCGCTGATG-3' and 5'-GCAT**AAGCTT**TTATTATCTTCCCAACCACGGCTG-3' were used to amplify <sup>lyt</sup>*envC* from pTU206-2 [*bla* P<sub>lac</sub>::<sup>ss</sup>*dsbA*-<sup>sf</sup>*gfp*-<sup>lyt</sup>*envC*(N412K)] and eliminate GTTTTGTTTCCATTTTCGTCGTAACGTTCTTGCATTTGCCGCTCTGTTGGCGCTCTCC, which was native *envC* sequence downstream of the stop codon. The resulting PCR product was purified and digested with *Bam*HI and *Hind*III and ligated into pTU115.

#### pNP38:

The plasmid pNP38 [*bla* P<sub>lac</sub>::<sup>ss</sup>*dsbA*-<sup>sf</sup>*gfp*-<sup>lyt</sup>*envC*(L400P)] was constructed as follows. The primers 5'-GTCA**GGATCC**GGTACCGAAAGCGAAAAATCGCTGATG-3' and 5'-GCAT**AAGCTT**TTATTATCTTCCCAACCACGGCTG-3' were used to amplify <sup>lyt</sup>*envC* from pTU206-5 [*bla* P<sub>lac</sub>::<sup>ss</sup>*dsbA*-<sup>sf</sup>*gfp*-<sup>lyt</sup>*envC*(L400P)] and eliminate GTTTTGTTTCCATTTTCGTCGTAACGTTCTTGCATTTGCCGCTCTGTTGGCGCTCTCC, which was native *envC* sequence downstream of the stop codon. The resulting PCR product was purified and digested with *Bam*HI and *Hind*III and ligated into pTU115.

#### pNP39:

The plasmid pNP39 [*bla* P<sub>lac</sub>::<sup>ss</sup>*dsbA*-<sup>sf</sup>*gfp*-<sup>lyt</sup>*envC*(V353A)] was constructed as follows. The primers 5'-GTCA**GGATCC**GGTACCGAAAGCGAAAAATCGCTGATG-3' and 5'-GCAT**AAGCTT**TTATTATCTTCCCAACCACGGCTG-3' were used to amplify <sup>lyt</sup>*envC* from pTU206-6 [*bla* P<sub>lac</sub>::<sup>ss</sup>*dsbA*-<sup>sf</sup>*gfp*-<sup>lyt</sup>*envC*(V353A)] and eliminate

GTTTTGTTTCCATTTTCGTCGTAACGTTCTTGCATTTGCCGCTCTGTTGGCGCTCTCC, which was native *envC* sequence downstream of the stop codon. The resulting PCR product was purified and digested with *Bam*HI and *Hind*III and ligated into pTU115.

pNP46: The plasmid pNP46 [*bla* P<sub>lac</sub>::<sup>ss</sup>*dsbA*-*sf**gfp*<sup>-35-419</sup>*envC*] was constructed as follows. The *envC* containing *Ascl*/*Hind*III fragment of pNP33 [*bla* P<sub>lac</sub>::<sup>ss</sup>*dsbA*-*sf**gfp*<sup>-*lyt*</sup>*envC*] was used to replace the corresponding fragment of pTU113 [*bla* P<sub>lac</sub>::<sup>ss</sup>*dsbA*-*sf**gfp*<sup>-35-419</sup>*envC*], eliminating GTTTTGTTTCCATTTTCGTCGTAACGTTCTTGCATTTGCCGCTCTGTTGGCGCTCTCC, which was native *envC* sequence downstream of the stop codon.

pNP52:

The plasmid pNP52 [*bla* P<sub>lac</sub>::<sup>ss</sup>*dsbA*-*mCherry*<sup>-35-419</sup>*envC*(Y350A)] was constructed as follows. The *lyt**envC*(Y350A) containing *Ascl*/*Hind*III fragment of pNP36 [*bla* P<sub>lac</sub>::<sup>ss</sup>*dsbA*-*sf**gfp*<sup>-*lyt*</sup>*envC*(Y350A)] was used to replace the corresponding fragment of pTU153 [*bla* P<sub>lac</sub>::<sup>ss</sup>*dsbA*-*mCherry*<sup>-35-419</sup>*envC*], thus including the mutation while removing GTTTTGTTTCCATTTTCGTCGTAACGTTCTTGCATTTGCCGCTCTGTTGGCGCTCTCC, native *envC* sequence downstream of the stop codon in pTU153.

pNP53:

The plasmid pNP53 [*bla* P<sub>lac</sub>::<sup>ss</sup>*dsbA*-*mCherry*<sup>-35-419</sup>*envC*(R405H)] was constructed as follows. The *lyt**envC*(R405H) containing *Ascl*/*Hind*III fragment of pNP35 [*bla* P<sub>lac</sub>::<sup>ss</sup>*dsbA*-*sf**gfp*<sup>-*lyt*</sup>*envC*(R405H)] was used to replace the corresponding fragment of pTU153 [*bla* P<sub>lac</sub>::<sup>ss</sup>*dsbA*-*mCherry*<sup>-35-419</sup>*envC*], thus including the mutation while removing

GTTTTGTTTCCATTTTCGTCGTAACGTTCTTGCATTTGCCGCTCTGTTGGCGCTCTCC, native *envC* sequence downstream of the stop codon in pTU153.

pNP54:

The plasmid pNP54 [*bla* P<sub>lac</sub>::<sup>ss</sup>*dsbA-mCherry*<sup>-35-419</sup>*envC*(K321E)] was constructed as follows.

The *lytenvC*(K321E) containing *Ascl/HindIII* fragment of pNP34 [*bla* P<sub>lac</sub>::<sup>ss</sup>*dsbA-sf gfp-*

*lytenvC*(K321E)] was used to replace the corresponding fragment of pTU153 [*bla* P<sub>lac</sub>::<sup>ss</sup>*dsbA-mCherry*<sup>-35-419</sup>*envC*], thus including the mutation while removing

GTTTTGTTTCCATTTTCGTCGTAACGTTCTTGCATTTGCCGCTCTGTTGGCGCTCTCC, native *envC* sequence downstream of the stop codon in pTU153.

pNP55:

The plasmid pNP55 [*bla* P<sub>lac</sub>::<sup>ss</sup>*dsbA-mCherry*<sup>-35-419</sup>*envC*] was constructed as follows. The

*lytenvC* containing *Ascl/HindIII* fragment of pNP33 [*bla* P<sub>lac</sub>::<sup>ss</sup>*dsbA-sf gfp-lytenvC*] was used to

replace the corresponding fragment of pTU153 [*bla* P<sub>lac</sub>::<sup>ss</sup>*dsbA-mCherry*<sup>-35-419</sup>*envC*], removing

GTTTTGTTTCCATTTTCGTCGTAACGTTCTTGCATTTGCCGCTCTGTTGGCGCTCTCC, which was native *envC* sequence downstream of the stop codon in pTU153.

pNP56:

The plasmid pNP56 [*bla* P<sub>lac</sub>::<sup>ss</sup>*dsbA-mCherry*<sup>-35-419</sup>*envC*(V353A)] was constructed as follows.

The *lytenvC*(V353A) containing *Ascl/HindIII* fragment of pNP39 [*bla* P<sub>lac</sub>::<sup>ss</sup>*dsbA-sf gfp-*

*lytenvC*(V353A)] was used to replace the corresponding fragment of pTU153 [*bla* P<sub>lac</sub>::<sup>ss</sup>*dsbA-mCherry*<sup>-35-419</sup>*envC*], thus including the mutation while removing

GTTTTGTTTCCATTTTCGTCGTAACGTTCTTGCATTTGCCGCTCTGTTGGCGCTCTCC, native *envC* sequence downstream of the stop codon in pTU153.

pNP60:

The plasmid pNP60 [*tetA* P<sub>lac</sub>::*flenvC*(R405H)] was constructed as follows. The *lytenvC*(R405H) containing *Ascl/HindIII* fragment of pNP35 [*bla* P<sub>lac</sub>::*ssdsbA-sfgfp-lytenvC*(R405H)] was used to replace the corresponding fragment of pNP31 [*tetA* P<sub>lac</sub>::*flenvC*].

pNP61:

The plasmid pNP59 [*tetA* P<sub>lac</sub>::*flenvC*(V353A)] was constructed as follows. The *lytenvC*(V353A) containing *Ascl/HindIII* fragment of pNP39 [*bla* P<sub>lac</sub>::*ssdsbA-sfgfp-lytenvC*(V353A)] was used to replace the corresponding fragment of pNP31 [*tetA* P<sub>lac</sub>::*flenvC*].

pNP63:

The plasmid pNP63 [*tetA* P<sub>lac</sub>::*flenvC*(Y350A)] was constructed as follows. The *lytenvC*(Y350A) containing *Ascl/HindIII* fragment of pNP36 [*bla* P<sub>lac</sub>::*ssdsbA-sfgfp-lytenvC*(Y350A)] was used to replace the corresponding fragment of pNP31 [*tetA* P<sub>lac</sub>::*flenvC*].

pNP65:

The plasmid pNP65 [*tetA* P<sub>lac</sub>::*flenvC*(K321E)] was constructed as follows. The *lytenvC*(K321E) containing *Ascl/HindIII* fragment of pNP34 [*bla* P<sub>lac</sub>::*ssdsbA-sfgfp-lytenvC*(K321E)] was used to replace the corresponding fragment of pNP31 [*tetA* P<sub>lac</sub>::*flenvC*].

pNP99: The plasmid pNP99 [*bla* P<sub>lac</sub>::<sup>ss</sup>*dsbA*-<sup>sf</sup>*gfp*<sup>-35-419</sup>*envC*(Y401E)] was constructed as follows. The internal primers 5'-GCCTTCACTC**GAG**TTCGAAATTCGCCGCCAGGG-3', 5'-GAATTTCGAACTC**GAG**TGAAGGCCGACCCTGAC-3' and external primers 5'-GCAT **GGATCC**GGTACCGAAAGCGA-3', 5'-TGAGTGACACAGGAACACTTAACGGCTG-3' were used for overlap extension site directed mutagenesis of pNP46 [*bla* P<sub>lac</sub>::<sup>ss</sup>*dsbA*-<sup>sf</sup>*gfp*<sup>-35-419</sup>*envC*]. The resulting <sup>35-419</sup>*envC*(Y401E) *Bam*HI/*Hind*III fragment was used to replace the corresponding fragment of pTU121 [*bla* P<sub>lac</sub>::<sup>ss</sup>*dsbA*-<sup>sf</sup>*gfp*<sup>-27-379</sup>*nlpD*].

pNP100: The plasmid pNP100 [*bla* P<sub>lac</sub>::<sup>ss</sup>*dsbA*-<sup>sf</sup>*gfp*<sup>-35-419</sup>*envC*(V324E)] was constructed as follows. The internal primers 5'-GAAAGGTATG**GAG**ATCGGTGCTTCTGAAGGTAC-3', 5'-AAGCACCGAT**CTC**CATACCTTTCCAGCGTAATT-3' and external primers 5'-GCAT **GGATCC**GGTACCGAAAGCGA-3', 5'-TGAGTGACACAGGAACACTTAACGGCTG-3' were used for overlap extension site directed mutagenesis of pNP46 [*bla* P<sub>lac</sub>::<sup>ss</sup>*dsbA*-<sup>sf</sup>*gfp*<sup>-35-419</sup>*envC*]. The resulting <sup>35-419</sup>*envC*(V324E) *Bam*HI/*Hind*III fragment was used to replace the corresponding fragment of pTU121 [*bla* P<sub>lac</sub>::<sup>ss</sup>*dsbA*-<sup>sf</sup>*gfp*<sup>-27-379</sup>*nlpD*].

pNP106: The plasmid [*bla* P<sub>lac</sub>::<sup>ss</sup>*dsbA*-*mCherry*<sup>-35-419</sup>*envC*(Y401E)] was constructed as follows. The <sup>35-419</sup>*envC*(Y401E) containing *Asc*I/*Hind*III fragment of pNP99 [*bla* P<sub>lac</sub>::<sup>ss</sup>*dsbA*-<sup>sf</sup>*gfp*<sup>-35-419</sup>*envC*(Y401E)] was used to replace the corresponding fragment of pTU153 [*bla* P<sub>lac</sub>::<sup>ss</sup>*dsbA*-*mCherry*<sup>-35-419</sup>*envC*].

pNP107: The plasmid [*tetA* P<sub>lac</sub>::<sup>fl</sup>*envC*(V324E)] was constructed as follows. The <sup>35-419</sup>*envC*(V324E) containing *Asc*I/*Hind*III fragment of pNP100 [*bla* P<sub>lac</sub>::<sup>ss</sup>*dsbA*-

*sf*gfp<sup>-35-419</sup>*envC*(V324E)] was used to replace the corresponding fragment of pNP31 [*bla* P<sub>lac</sub>::<sup>ss</sup>*dsbA*-*sf*gfp<sup>-35-419</sup>*envC*(Y401E)].

*pNP108*: The plasmid [*bla* P<sub>lac</sub>::<sup>ss</sup>*dsbA*-*mCherry*<sup>-35-419</sup>*envC*(V324E)] was constructed as follows. The <sup>35-419</sup>*envC*(V324E) containing *Ascl*/*Hind*III fragment of pNP100 [*bla* P<sub>lac</sub>::<sup>ss</sup>*dsbA*-*sf*gfp<sup>-35-419</sup>*envC*(V324E)] was used to replace the corresponding fragment of pTU153 [*bla* P<sub>lac</sub>::<sup>ss</sup>*dsbA*-*mCherry*<sup>-35-419</sup>*envC*].

*pNP109*: The plasmid [*tetA* P<sub>lac</sub>::<sup>fl</sup>*envC*(Y401E)] was constructed as follows. The <sup>35-419</sup>*envC*(Y401E) containing *Ascl*/*Hind*III fragment of pNP99 [*bla* P<sub>lac</sub>::<sup>ss</sup>*dsbA*-*sf*gfp<sup>-35-419</sup>*envC*(Y401E)] was used to replace the corresponding fragment of pNP31 [*tetA* P<sub>lac</sub>::<sup>fl</sup>*envC*].

*pTB280*: The plasmid pTB280 [*bla*(M182T)] was constructed as follows. The primers 5'-GAGCGTGACACC**ACG**ACGCCTGTAGCAATGGCA-3' and 5'-TGCCATTGCTACAGG**CGT**CGTGGTGTACGCTC-3' were used for site directed mutagenesis to create the (M182T) mutation in the beta lactamase gene on the template plasmid pTD16 [*bla*].

*pTD50*: The plasmid pTD50 [*cat* P<sub>ara</sub>::<sup>ss</sup>*dsbA*-*bla*] was constructed as follows. The *bla*(M182T) containing *Avr*II/*Hind*III fragment of pTB280 [*bla*(M182T)] was used to replace the corresponding fragment of pTB286 [*cat* P<sub>ara</sub>::<sup>ss</sup>*dsbA*-*sf*gfp].

*pTD51*: The plasmid pTD51 [*bla* P<sub>lac</sub>::<sup>ss</sup>*dsbA*-*sf**gfp*] was constructed as follows. The primers 5'-GCAGTATGAAGATCTGGAGGGTCCGGCTGGTC-3' and 5'-GACCAGCCGGACCCTCCAGATCTTCATACTGC-3' were used for site directed mutagenesis to eliminate the *Xho*I restriction site at the junction between the <sup>ss</sup>*dsbA* and the linker.

*pTD52*: The plasmid pTD52 [*cat* P<sub>ara</sub>::<sup>ss</sup>*dsbA*-*sf**gfp*-*bla*] was constructed as follows. The *Xba*I/*Hind*III containing fragment of pTD51 [*bla* P<sub>lac</sub>::<sup>ss</sup>*dsbA*-*sf**gfp*] was used to replace the corresponding fragment of pTD50 [*cat* P<sub>ara</sub>::<sup>ss</sup>*dsbA*-*bla*].

*pTD70*: The plasmid pTD70 [*cat* P<sub>ara</sub>::<sup>ss</sup>*dsbA*-*sf**gfp*-*bla*] was constructed as follows. The primers 5'-GATCCCAGTAATAACAGCAGGCATGCCAGCAGCAGC-3' and 5'-TCGAGCTGCTGCTGGCATGCCTGCTGTTACTTGG-3' were annealed to pTD52 to add a *Sph*I site in the linker portion of the <sup>ss</sup>*dsbA*-*sf**gfp*-*bla* fusion.

*pTU115*: The plasmid pTU115 [*bla* P<sub>lac</sub>::<sup>ss</sup>*dsbA*-*sf**gfp*-<sup>lyt</sup>*envC*] was constructed as follows. The primers 5'-GTCA**GGATCC**GGTACCGAAAGCGAAAAATCGCTGATG-3' and 5'-GTCA**AAGCTT**GGAGAGCGCCAACAGAGCGGC-3' were used to create an <sup>278-419</sup>*envC* fragment (<sup>lyt</sup>*envC*) from MG1655 adding *Bam*HI/*Hind*III restriction sites. The resulting fragment replaced the corresponding fragment from pTB263 [*bla* P<sub>lac</sub>::<sup>ss</sup>*dsbA*-*sf**gfp*].

*pTU121*: The plasmid pTU121 [*bla* P<sub>lac</sub>::<sup>ss</sup>*dsbA*-*sf**gfp*-<sup>27-379</sup>*nlpD*] was constructed as follows. The primers 5'-GTCAG**GGATCC**TCTGACACTTCAAATCCACCGGC-3' and 5'-GTCA**AAGCTT**CCGCCGATTTATCGCTGC-3' were used to create an <sup>27-419</sup>*nlpD* fragment from



MG1655 adding *Bam*HI/*Hind*III restriction sites. The resulting fragment replaced the corresponding fragment from pTB263 [*bla* P<sub>lac</sub>::<sup>ss</sup>*dsbA*-<sup>sf</sup>*gfp*].

*pTU153*: The plasmid pTU153 [*bla* P<sub>lac</sub>::<sup>ss</sup>*dsbA*-*mCherry*<sup>-35-419</sup>*envC*] was constructed as follows. The <sup>35-419</sup>*envC* containing *Bam*HI/*Hind*III fragment from pTU113 [*bla* P<sub>lac</sub>::<sup>ss</sup>*dsbA*-<sup>sf</sup>*gfp*<sup>-35-419</sup>*envC*] was used to replace the corresponding fragment from pTU136 [*bla* P<sub>lac</sub>::<sup>ss</sup>*dsbA*-*mCherry*].

*pTU206-2*: The plasmid pTU206-2 [*cat* P<sub>ara</sub>::<sup>ss</sup>*dsbA*-<sup>sf</sup>*gfp*<sup>-lyt</sup>*envC*(N412K)-*bla*] was constructed as follows. Mutagenic PCR was performed using MG1655 genomic DNA and primers 5'-GTCAGGATCCGGTACCGAAAGCGAAAAATCGCTGATG-3' and 5'-GTCACTCGAGTCTTCCCAACCACGGCTGTGG-3'. The primers also created *Bam*HI and *Xho*I restrictions sites, used to incorporate the mutagenized fragment into pTD70.

*pTU206-5*: The plasmid pTU206-2 [*cat* P<sub>ara</sub>::<sup>ss</sup>*dsbA*-<sup>sf</sup>*gfp*<sup>-lyt</sup>*envC*(L400P)-*bla*] was constructed as follows. Mutagenic PCR was performed using MG1655 genomic DNA and primers 5'-GTCAGGATCCGGTACCGAAAGCGAAAAATCGCTGATG-3' and 5'-GTCACTCGAGTCTTCCCAACCACGGCTGTGG-3'. The primers also created *Bam*HI and *Xho*I restrictions sites, used to incorporate the mutagenized fragment into pTD70.

*pTU206-6*: The plasmid pTU206-2 [*cat* P<sub>ara</sub>::<sup>ss</sup>*dsbA*-<sup>sf</sup>*gfp*<sup>-lyt</sup>*envC*(V353A)-*bla*] was constructed as follows. Mutagenic PCR was performed using MG1655 genomic DNA and primers 5'-GTCAGGATCCGGTACCGAAAGCGAAAAATCGCTGATG-3' and 5'-

GTCA**CTCGAG**TCTTCCCAACCACGGCTGTGG-3'. The primers also created *Bam*HI and *Xho*I restrictions sites, used to incorporate the mutagenized fragment into pTD70.

pTU206-63: The plasmid pTU206-2 [*cat* P<sub>ara</sub>::<sup>ss</sup>*dsbA*-<sup>sf</sup>*gfp*-<sup>lyt</sup>*envC*(R405H)-*bla*] was constructed as follows. Mutagenic PCR was performed using MG1655 genomic DNA and primers 5'-GTCA**GGATCC**GGTACCGAAAGCGAAAAATCGCTGATG-3' and 5'-GTCA**CTCGAG**TCTTCCCAACCACGGCTGTGG-3'. The primers also created *Bam*HI and *Xho*I restrictions sites, used to incorporate the mutagenized fragment into pTD70.

**Table S1.** Data collection and refinement statistics

|                                    |                             |
|------------------------------------|-----------------------------|
| Data collection                    |                             |
| X-ray source                       | ESRF beamline ID14EH1       |
| Scan range (°)                     | 360                         |
| Oscillation (°)                    | 0.5                         |
| Space group                        | P31                         |
| Unit-cell parameters               |                             |
| a, Å                               | 57.4                        |
| b, Å                               | 57.4                        |
| c, Å                               | 129.3                       |
| α, °                               | 90                          |
| β, °                               | 90                          |
| γ, °                               | 120                         |
| Resolution (last shell), Å         | 1.56 (1.66-1.56)            |
| Completeness (last shell), %       | 96.4 (73.0)                 |
| //σ( <i>I</i> ) (last shell)       | 15.9 (2.8)                  |
| Rsym† (last shell), %              | 7.6 (49.3)                  |
| No of unique reflections           | 64864                       |
| Wilson B factor, (Å <sup>2</sup> ) | 19.02                       |
| Refinement and model statistics    |                             |
| Resolution (last shell), Å         | 1.57 (1.65-1.57)            |
| R-factor‡, R-free§(last shell)     | 0.166, 0.207 (0.266, 0.315) |
| Molecules/asymmetric unit          | 4                           |
| rmsd from target <sup>l</sup>      |                             |
| Bond lengths, Å                    | 0.0135                      |
| Bond angle, °                      | 1.639                       |
| Average B-factor, Å <sup>2</sup>   | 14.9                        |
| Mean B factor (Å <sup>2</sup> )    | 14.897                      |
| Ramachandran plot**                |                             |
| Core, %                            | 91.2                        |
| Additionally allowed, %            | 8.8                         |
| Generously allowed, %              | 0                           |
| Disallowed, %                      | 0                           |

†Rsym =  $(\sum(\text{ABS}(|I(h,i)| - |I(h)|))) / (\sum(|I(h,i)|))$ .

‡R-factor =  $\sum |jF_o - jF_c| / \sum |jF_o|$  where  $F_o$  and  $F_c$  are the observed and calculated structure factor amplitudes, respectively.

§R-free is the R-factor calculated with 5% of the reflections chosen at random and omitted from refinement.

<sup>l</sup>rmsd of bond lengths and bond angles from ideal geometry.

\*\*Performed by Procheck.

**Table S2. Strains used in this study.**

| Strain     | Genotype <sup>a</sup>                                                                            | Source/Reference <sup>b</sup>  |
|------------|--------------------------------------------------------------------------------------------------|--------------------------------|
| DH5α       | <i>F– hsdR17 deoR recA1 endA1 phoA supE44 thi-1 gyrA96 relA1 Δ(lacZYA-argF)U169 ϕ80dlacZΔM15</i> | Gibco BRL                      |
| BL21(λDE3) | <i>ompT rB– mB– (PlacUV5::T7gene1)</i>                                                           | Novagen                        |
| BW25113    | <i>Δ(araD-araB)567 ΔlacZ4787(::rrnB-3) rph-1 Δ(rhaD-rhaB)568 hsdR514</i>                         | (Baba <i>et al.</i> , 2006)    |
| TB10       | <i>rph1 ilvG rfb-50 λΔcro-bio nad::Tn10</i>                                                      | (Johnson <i>et al.</i> , 2004) |
| TB28       | MG1655 <i>ΔlacZYA::frt</i>                                                                       | (Bernhardt and de Boer, 2004)  |
| TB134      | TB28 <i>ΔenvC::Kan<sup>r</sup></i>                                                               | (Bernhardt and de Boer, 2004)  |
| TB145      | TB28 <i>ΔnlpD::frt</i>                                                                           | (Peters <i>et al.</i> , 2011)  |
| HC260      | TB10 <i>zapA-GFP Cam<sup>r</sup></i>                                                             | (Peters <i>et al.</i> , 2011)  |
| HC262      | TB28 <i>envC::frt zapA-GFP Cam<sup>r</sup></i>                                                   | (Peters <i>et al.</i> , 2011)  |
| NP1        | TB28 <i>zapA-GFP frt</i>                                                                         | (Peters <i>et al.</i> , 2011)  |
| NP32       | TB28 <i>envC::frt zapA-GFP frt</i>                                                               | (Peters <i>et al.</i> , 2011)  |
| NP130      | TB28 <i>ΔnlpD::frt ΔenvC::Kan<sup>r</sup></i>                                                    | P1(TB145) xTB134               |

<sup>a</sup> The Kan<sup>R</sup> cassette is flanked by *frt* sites for removal by FLP recombinase. An *frt* scar remains following removal of the cassette using FLP expressed from pCP20.

<sup>b</sup> Strain constructions by P1 transduction are described using the shorthand: P1(donor) x recipient. In all cases transductants were selected on LB Kan plates.

**Table S3. Plasmids used in this study.**

| Plasmid | Genotype                                                                                                           | Origin    | Source or reference           |
|---------|--------------------------------------------------------------------------------------------------------------------|-----------|-------------------------------|
| pBD4    | <i>attHK022 bla lacI<sup>q</sup> P<sub>lac</sub>::<sup>ss</sup>dsbA-sf<sup>gfp</sup>-lyt<sup>envC</sup>(Y350A)</i> | R6K       | This Study                    |
| pCP20   | <i>bla cat cl875 repA(Ts) PR::flp</i>                                                                              | pSC101    | (Datsenko and Wanner, 2000)   |
| pDY280  | <i>bla lacI<sup>q</sup> P<sub>T7</sub>::H-SUMO-lyt<sup>envC</sup></i>                                              | pBR/colE1 | This Study                    |
| pDY281  | <i>bla lacI<sup>q</sup> P<sub>T7</sub>::H-SUMO-lyt<sup>envC</sup>(K321E)</i>                                       | pBR/colE1 | This Study                    |
| pDY282  | <i>bla lacI<sup>q</sup> P<sub>T7</sub>::H-SUMO-lyt<sup>envC</sup>(R405H)</i>                                       | pBR/colE1 | This Study                    |
| pDY283  | <i>bla lacI<sup>q</sup> P<sub>T7</sub>::H-SUMO-lyt<sup>envC</sup>(Y350A)</i>                                       | pBR/colE1 | This Study                    |
| pDY286  | <i>bla lacI<sup>q</sup> P<sub>T7</sub>::H-SUMO-lyt<sup>envC</sup>(V353A)</i>                                       | pBR/colE1 | This Study                    |
| pFC2    | <i>attHK022 bla lacI<sup>q</sup> P<sub>lac</sub>::<sup>ss</sup>dsbA-sf<sup>gfp</sup>-lyt<sup>envC</sup>(K321E)</i> | R6K       | This Study                    |
| pINT-ts | <i>bla cl875 repA(Ts) P<sub>R</sub>::intλ</i>                                                                      | pSC101    | (Haldimann and Wanner, 2001)  |
| pMM60   | <i>attHK022 tetA tetR lacI<sup>q</sup> P<sub>lac</sub>::ycfM-sf<sup>gfp</sup></i>                                  | R6K       | (Peters <i>et al.</i> , 2011) |
| pNP31   | <i>attHK022 tetA tetR lacI<sup>q</sup> P<sub>lac</sub>::<sup>fl</sup>envC</i>                                      | R6K       | This Study                    |
| pNP33   | <i>attHK022 bla lacI<sup>q</sup> P<sub>lac</sub>::<sup>ss</sup>dsbA-sf<sup>gfp</sup>-lyt<sup>envC</sup></i>        | R6K       | This Study                    |
| pNP34   | <i>attHK022 bla lacI<sup>q</sup> P<sub>lac</sub>::<sup>ss</sup>dsbA-sf<sup>gfp</sup>-lyt<sup>envC</sup>(K321E)</i> | R6K       | This Study                    |
| pNP35   | <i>attHK022 bla lacI<sup>q</sup> P<sub>lac</sub>::<sup>ss</sup>dsbA-sf<sup>gfp</sup>-lyt<sup>envC</sup>(R405H)</i> | R6K       | This Study                    |
| pNP36   | <i>attHK022 bla lacI<sup>q</sup> P<sub>lac</sub>::<sup>ss</sup>dsbA-sf<sup>gfp</sup>-lyt<sup>envC</sup>(Y350A)</i> | R6K       | This Study                    |
| pNP37   | <i>attHK022 bla lacI<sup>q</sup> P<sub>lac</sub>::<sup>ss</sup>dsbA-sf<sup>gfp</sup>-lyt<sup>envC</sup>(N412K)</i> | R6K       | This Study                    |
| pNP38   | <i>attHK022 bla lacI<sup>q</sup> P<sub>lac</sub>::<sup>ss</sup>dsbA-sf<sup>gfp</sup>-lyt<sup>envC</sup>(L400P)</i> | R6K       | This Study                    |
| pNP39   | <i>attHK022 bla lacI<sup>q</sup> P<sub>lac</sub>::<sup>ss</sup>dsbA-sf<sup>gfp</sup>-lyt<sup>envC</sup>(V353A)</i> | R6K       | This Study                    |

|        |                                                                                                               |     |                               |
|--------|---------------------------------------------------------------------------------------------------------------|-----|-------------------------------|
| pNP46  | <i>attHK022 bla lacI<sup>q</sup> P<sub>lac</sub>::<sup>ss</sup>dsbA-sf gfp<sup>-35-419</sup> envC</i>         | R6K | This Study                    |
| pNP52  | <i>attHK022 bla lacI<sup>q</sup> P<sub>lac</sub>::<sup>ss</sup>dsbA-mCherry<sup>-35-419</sup> envC(Y350A)</i> | R6K | This Study                    |
| pNP53  | <i>attHK022 bla lacI<sup>q</sup> P<sub>lac</sub>::<sup>ss</sup>dsbA-mCherry<sup>-35-419</sup> envC(R405H)</i> | R6K | This Study                    |
| pNP54  | <i>attHK022 bla lacI<sup>q</sup> P<sub>lac</sub>::<sup>ss</sup>dsbA-mCherry<sup>-35-419</sup> envC(K321E)</i> | R6K | This Study                    |
| pNP55  | <i>attHK022 bla lacI<sup>q</sup> P<sub>lac</sub>::<sup>ss</sup>dsbA-mCherry<sup>-35-419</sup> envC</i>        | R6K | This Study                    |
| pNP56  | <i>attHK022 bla lacI<sup>q</sup> P<sub>lac</sub>::<sup>ss</sup>dsbA-mCherry<sup>-35-419</sup> envC(V353A)</i> | R6K | This Study                    |
| pNP60  | <i>attHK022 tetA tetR lacI<sup>q</sup> P<sub>lac</sub>::<sup>fl</sup>envC(R405H)</i>                          | R6K | This Study                    |
| pNP61  | <i>attHK022 tetA tetR lacI<sup>q</sup> P<sub>lac</sub>::<sup>fl</sup>envC(V353A)</i>                          | R6K | This Study                    |
| pNP63  | <i>attHK022 tetA tetR lacI<sup>q</sup> P<sub>lac</sub>::<sup>fl</sup>envC(Y350A)</i>                          | R6K | This Study                    |
| pNP65  | <i>attHK022 tetA tetR lacI<sup>q</sup> P<sub>lac</sub>::<sup>fl</sup>envC(K321E)</i>                          | R6K | This Study                    |
| pNP99  | <i>attHK022 bla lacI<sup>q</sup> P<sub>lac</sub>::<sup>ss</sup>dsbA-sf gfp<sup>-35-419</sup> envC(Y401E)</i>  | R6K | This Study                    |
| pNP100 | <i>attHK022 bla lacI<sup>q</sup> P<sub>lac</sub>::<sup>ss</sup>dsbA-sf gfp<sup>-35-419</sup> envC(V324E)</i>  | R6K | This Study                    |
| pNP106 | <i>attHK022 bla lacI<sup>q</sup> P<sub>lac</sub>::<sup>ss</sup>dsbA-mCherry<sup>-35-419</sup> envC(Y401E)</i> | R6K | This Study                    |
| pNP107 | <i>attHK022 tetA tetR lacI<sup>q</sup> P<sub>lac</sub>::<sup>fl</sup>envC(V324E)</i>                          | R6K | This Study                    |
| pNP108 | <i>attHK022 bla lacI<sup>q</sup> P<sub>lac</sub>::<sup>ss</sup>dsbA-mCherry<sup>-35-419</sup> envC(V324E)</i> | R6K | This Study                    |
| pNP109 | <i>attHK022 tetA tetR lacI<sup>q</sup> P<sub>lac</sub>::<sup>fl</sup>envC(Y401E)</i>                          | R6K | This Study                    |
| pTB263 | <i>attHK022 bla lacI<sup>q</sup> P<sub>lac</sub>::<sup>ss</sup>dsbA-sf gfp</i>                                | R6K | (Uehara <i>et al.</i> , 2009) |
| pTB280 | <i>attHK022 bla(M182T) lacI<sup>q</sup></i>                                                                   | R6K | This Study                    |
| pTB286 | <i>attλ cat araC P<sub>ara</sub>::<sup>ss</sup>dsbA-sf gfp</i>                                                | R6K | (Cho <i>et al.</i> , 2011)    |
| pTD16  | <i>attHK022 bla lacI<sup>q</sup></i>                                                                          | R6K | (Uehara <i>et al.</i> , 2009) |

|           |                                                                                                              |           |                                |
|-----------|--------------------------------------------------------------------------------------------------------------|-----------|--------------------------------|
| pTD25     | <i>attλ cat araC P<sub>ara</sub>::<sup>fl</sup>envC</i>                                                      | R6K       | (Uehara <i>et al.</i> , 2009)  |
| pTD50     | <i>attλ cat araC P<sub>ara</sub>::<sup>ss</sup>dsbA-bla</i>                                                  | R6K       | This Study                     |
| pTD51     | <i>attHK022 bla lacI<sup>q</sup> P<sub>lac</sub>::<sup>ss</sup>dsbA-sf gfp</i>                               | R6K       | This Study                     |
| pTD52     | <i>attλ cat araC P<sub>ara</sub>::<sup>ss</sup>dsbA-sf gfp-bla</i>                                           | R6K       | This Study                     |
| pTD68     | <i>bla P<sub>T7</sub>-H-SUMO</i>                                                                             | pBR/colE1 | (Yang <i>et al.</i> , 2012)    |
| pTD70     | <i>attλ cat araC P<sub>ara</sub>::<sup>ss</sup>dsbA-sf gfp-bla</i>                                           | R6K       | This Study                     |
| pTU113    | <i>attHK022 bla lacI<sup>q</sup> P<sub>lac</sub>::<sup>ss</sup>dsbA-sf gfp<sup>-35-419</sup>envC</i>         | R6K       | (Uehara <i>et al.</i> , 2010)  |
| pTU115    | <i>attHK022 bla lacI<sup>q</sup> P<sub>lac</sub>::<sup>ss</sup>dsbA-sf gfp<sup>-lyt</sup>envC</i>            | R6K       | This Study                     |
| pTU121    | <i>attHK022 bla lacI<sup>q</sup> P<sub>lac</sub>::<sup>ss</sup>dsbA-sf gfp<sup>-27-379</sup>nlpD</i>         | R6K       | This Study                     |
| pTU136    | <i>attHK022 bla lacI<sup>q</sup> P<sub>lac</sub>::<sup>ss</sup>dsbA-mCherry</i>                              | R6K       | (Uehara <i>et al.</i> , 2009)  |
| pTU153    | <i>attHK022 bla lacI<sup>q</sup> P<sub>lac</sub>::<sup>ss</sup>dsbA-mCherry<sup>-35-419</sup>envC</i>        | R6K       | This Study                     |
| pTU206-2  | <i>attHK022 bla lacI<sup>q</sup> P<sub>ara</sub>::<sup>ss</sup>dsbA-sf gfp<sup>-lyt</sup>envC(N412K)-bla</i> | R6K       | This Study<br>(mutant isolate) |
| pTU206-5  | <i>attHK022 bla lacI<sup>q</sup> P<sub>ara</sub>::<sup>ss</sup>dsbA-sf gfp<sup>-lyt</sup>envC(L400P)-bla</i> | R6K       | This Study<br>(mutant isolate) |
| pTU206-6  | <i>attHK022 bla lacI<sup>q</sup> P<sub>ara</sub>::<sup>ss</sup>dsbA-sf gfp<sup>-lyt</sup>envC(V353A)-bla</i> | R6K       | This Study<br>(mutant isolate) |
| pTU206-63 | <i>attHK022 bla lacI<sup>q</sup> P<sub>ara</sub>::<sup>ss</sup>dsbA-sf gfp<sup>-lyt</sup>envC(R405H)-bla</i> | R6K       | This Study<br>(mutant isolate) |

<sup>a</sup> A 6xHis tag for purification is indicated by the letter *H*. <sup>ss</sup>*dsbA* corresponds to the first 24 codons of *dsbA* encoding its export signal. P<sub>lac</sub>, P<sub>T7</sub>, P<sub>R</sub>, and P<sub>ara</sub> indicate the lactose, phage T7, λR and arabinose promoters, respectively. Numbers in parenthesis indicate the codons included in the relevant clones.

## REFERENCES

- Baba, T., Ara, T., Hasegawa, M., Takai, Y., Okumura, Y., Baba, M., *et al.* (2006) Construction of Escherichia coli K-12 in-frame, single-gene knockout mutants: the Keio collection. *Mol Syst Biol* **2**: 2006.0008.
- Bernhardt, T.G., and de Boer, P.A.J. (2004) Screening for synthetic lethal mutants in Escherichia coli and identification of EnvC (YibP) as a periplasmic septal ring factor with murein hydrolase activity. *Mol Microbiol* **52**: 1255–1269.
- Cheng, T.M.-K., Blundell, T.L., and Fernandez-Recio, J. (2007) pyDock: electrostatics and desolvation for effective scoring of rigid-body protein-protein docking. *Proteins* **68**: 503–515.
- Cho, H., McManus, H.R., Dove, S.L., and Bernhardt, T.G. (2011) Nucleoid occlusion factor SlmA is a DNA-activated FtsZ polymerization antagonist. *Proc Natl Acad Sci USA* **108**: 3773–3778.
- Datsenko, K.A., and Wanner, B.L. (2000) One-step inactivation of chromosomal genes in Escherichia coli K-12 using PCR products. *Proc Natl Acad Sci USA* **97**: 6640–6645.
- Gabb, H.A., Jackson, R.M., and Sternberg, M.J. (1997) Modelling protein docking using shape complementarity, electrostatics and biochemical information. *J Mol Biol* **272**: 106–120.
- Haldimann, A., and Wanner, B.L. (2001) Conditional-replication, integration, excision, and retrieval plasmid-host systems for gene structure-function studies of bacteria. *J Bacteriol* **183**: 6384–6393.
- Johnson, J.E., Lackner, L.L., Hale, C.A., and de Boer, P.A.J. (2004) ZipA is required for targeting of DMinC/DicB, but not DMinC/MinD, complexes to septal ring assemblies in Escherichia coli. *J Bacteriol* **186**: 2418–2429.
- Peters, N.T., Dinh, T., and Bernhardt, T.G. (2011) A fail-safe mechanism in the septal ring assembly pathway generated by the sequential recruitment of cell separation amidases and their activators. *J Bacteriol* **193**: 4973–4983.
- Uehara, T., Dinh, T., and Bernhardt, T.G. (2009) LytM-domain factors are required for daughter cell separation and rapid ampicillin-induced lysis in Escherichia coli. *J Bacteriol* **191**: 5094–5107.
- Uehara, T., Parzych, K.R., Dinh, T., and Bernhardt, T.G. (2010) Daughter cell separation is controlled by cytokinetic ring-activated cell wall hydrolysis. *EMBO J* **29**: 1412–1422.
- Yang, D.C., Tan, K., Joachimiak, A., and Bernhardt, T.G. (2012) A conformational switch controls cell wall-remodelling enzymes required for bacterial cell division. *Mol Microbiol* **85**: 768–781.



## Supplemental Figure Legends

**Figure S1. Superimposition of <sup>Lyt</sup>EnvC and <sup>Sa</sup>LytM.** Shown are additional views of the superimposition of <sup>Lyt</sup>EnvC (cyan) with truncated <sup>Sa</sup>LytM (green) (PDB ID: 2b13) (Firczuk et al., 2005) highlighting the zinc ion present in the <sup>Sa</sup>LytM active site as a grey sphere and the residues involved in Zn coordination as sticks. Note that none of the Zn-coordinating residues of <sup>Sa</sup>LytM (H210, D214 and H293) are conserved in <sup>Lyt</sup>EnvC (W320, V324, Y401). Residue labels are colored the same as their corresponding structure, <sup>Lyt</sup>EnvC (cyan) and <sup>Sa</sup>LytM (green).

**Figure S2. Steady state accumulation of defective <sup>SF</sup>GFP-<sup>Lyt</sup>EnvC variants.** Protein extracts from cultures producing <sup>SF</sup>GFP-<sup>Lyt</sup>EnvC variants were prepared and subjected to immunoblotting for the detection of the fusions as described in the legend to Figure 3.

**Figure S3. Amidase activation function of <sup>FL</sup>EnvC variants.** Cells of strain NP130 [ $\Delta envC \Delta nlpD$ ] producing the indicated <sup>FL</sup>EnvC variants under control of the arabinose promoter were grown and imaged as described in the legend to Figure 5.

**Figure S4. Recruitment of mCherry-<sup>FL</sup>EnvC variants to the septal ring.** Cells of strain NP32 [ $\Delta envC zapA$ -GFP] producing the indicated mCherry-<sup>FL</sup>EnvC variant were grown and imaged as described in the legend to Figure 5.

**Figure S5. Rigid-body docking of the AmiB autoinhibitory helix with <sup>Lyt</sup>EnvC.** Ribbon (A, C) and surface (B, D) representations of the best 10 rigid-body docking orientations of a model of AmiB autoinhibitory helix with <sup>Lyt</sup>EnvC. Models were generated by FTDock (Gabb et al.,

1997) and evaluated by pyDock scoring function (Cheng *et al.*, 2007). Scoring values are tabulated in (E) and include electrostatics (Ele), desolvation (Desolv) energy and limited van der Waals (VDW) contribution. All energy values are given in kcal/mol. The number of hydrogen bonds (Hb) between AmiB  $\alpha$ 3 helix and EnvC are also given. The color of the rows in the table corresponds with that of the amidase autoinhibitory helix docking model in A-D.

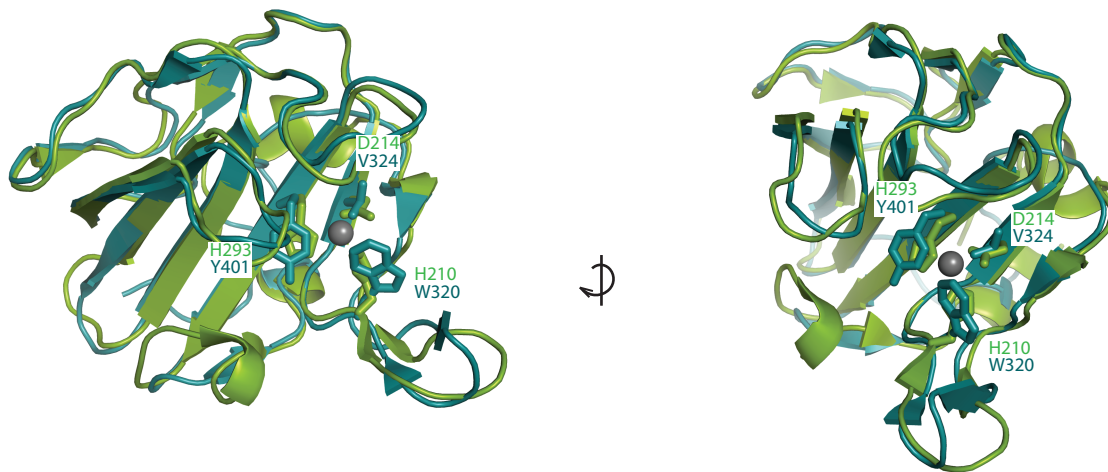

Figure S1

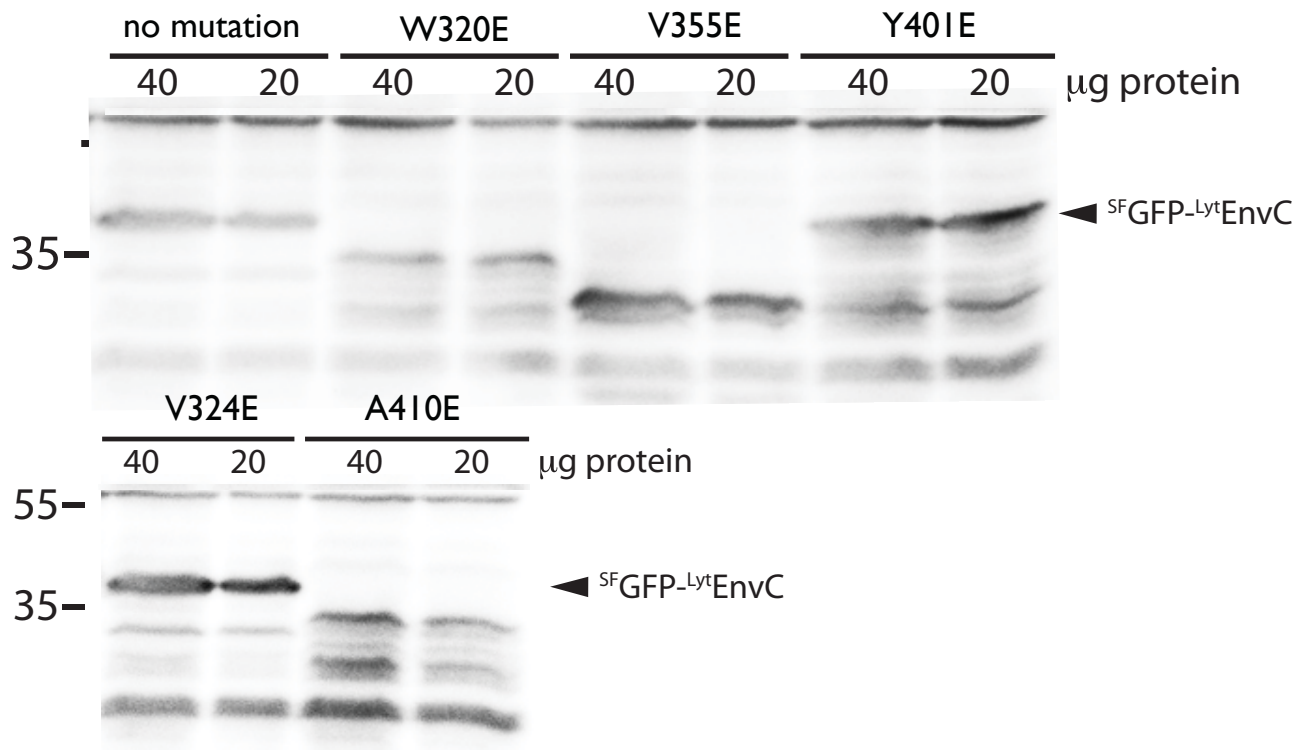

Figure S2

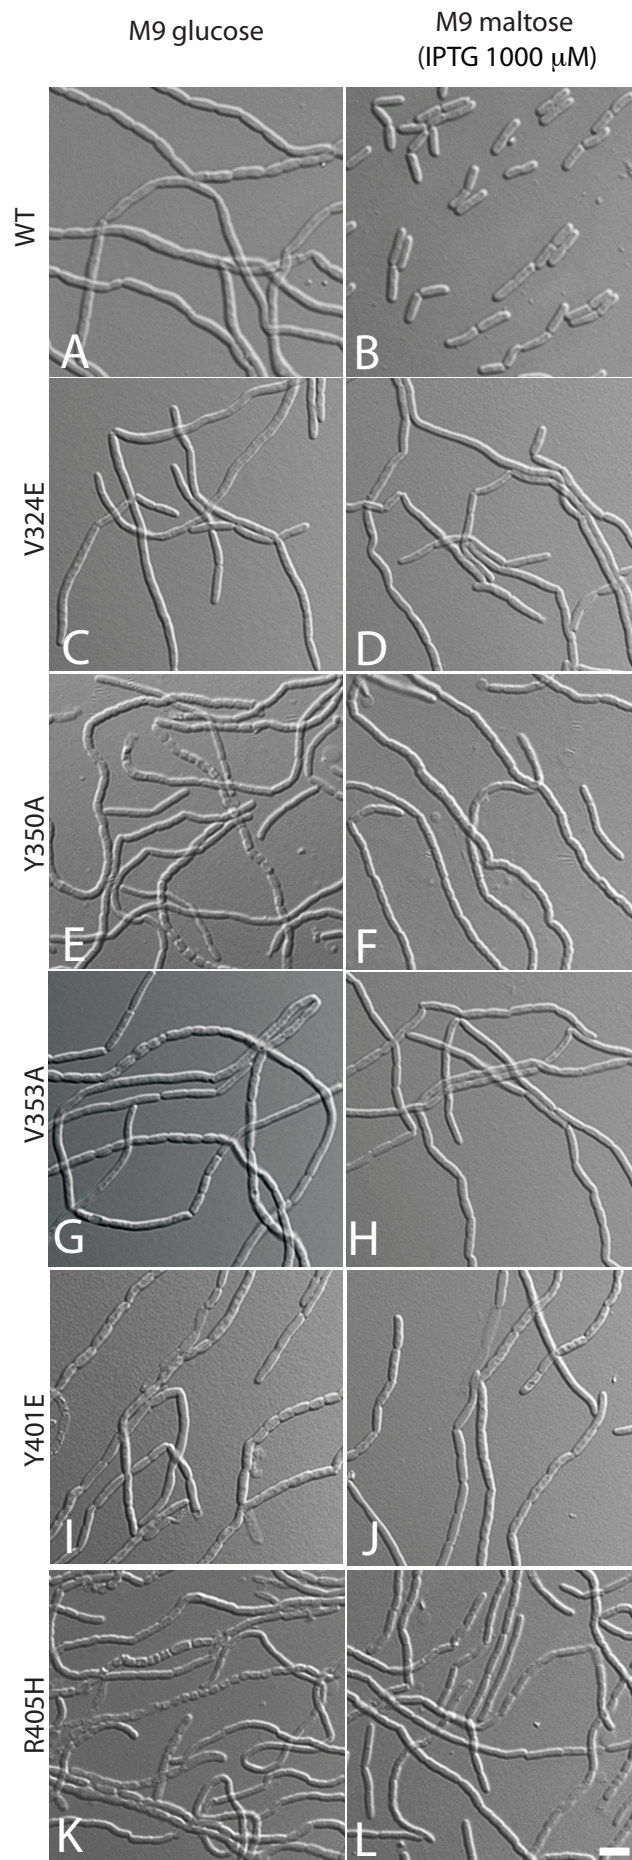

Figure S3

$\Delta envC zapA::gfp P_{lac}::mCherry^{-fl} envC$

M9 glucose

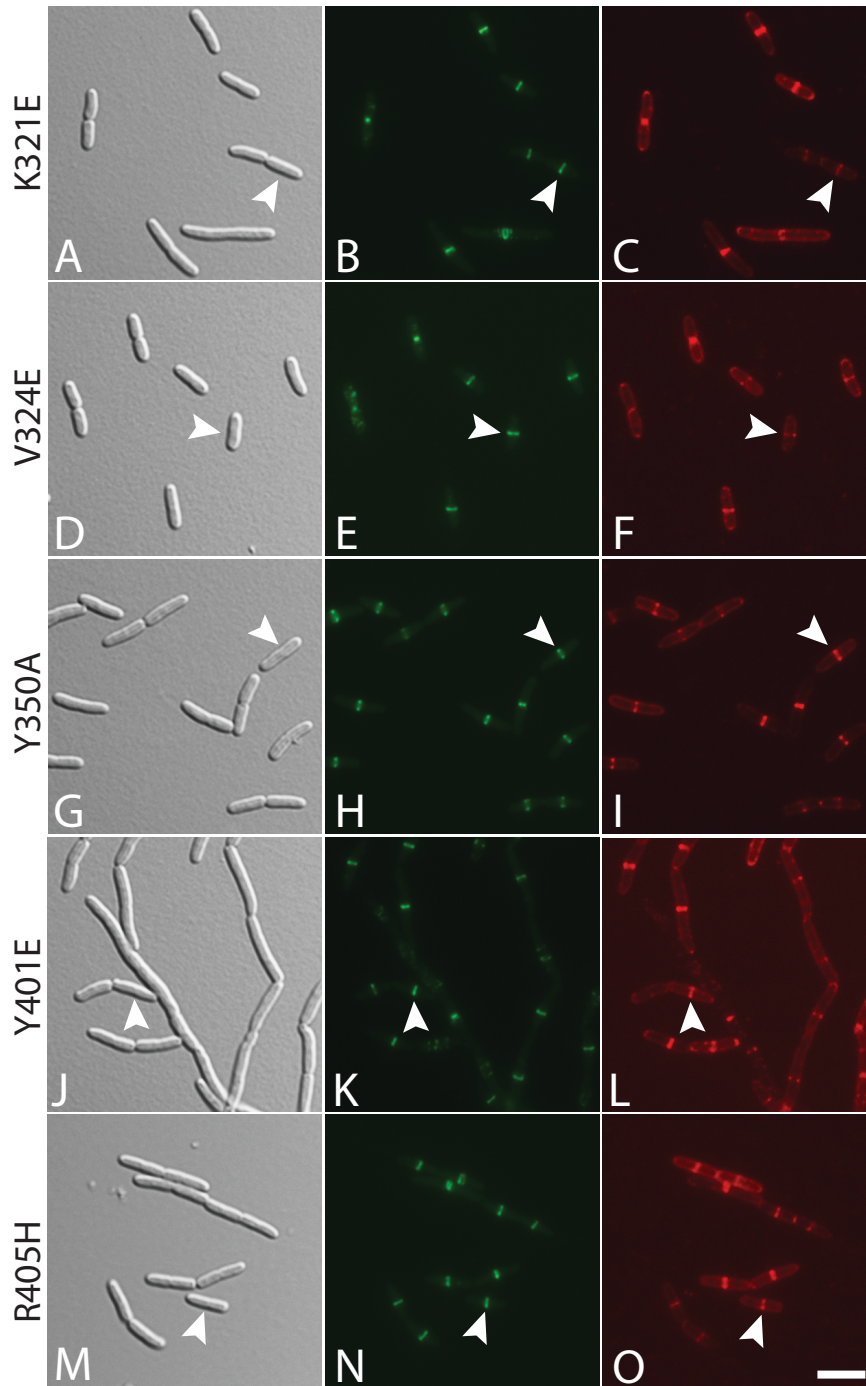

Figure S4



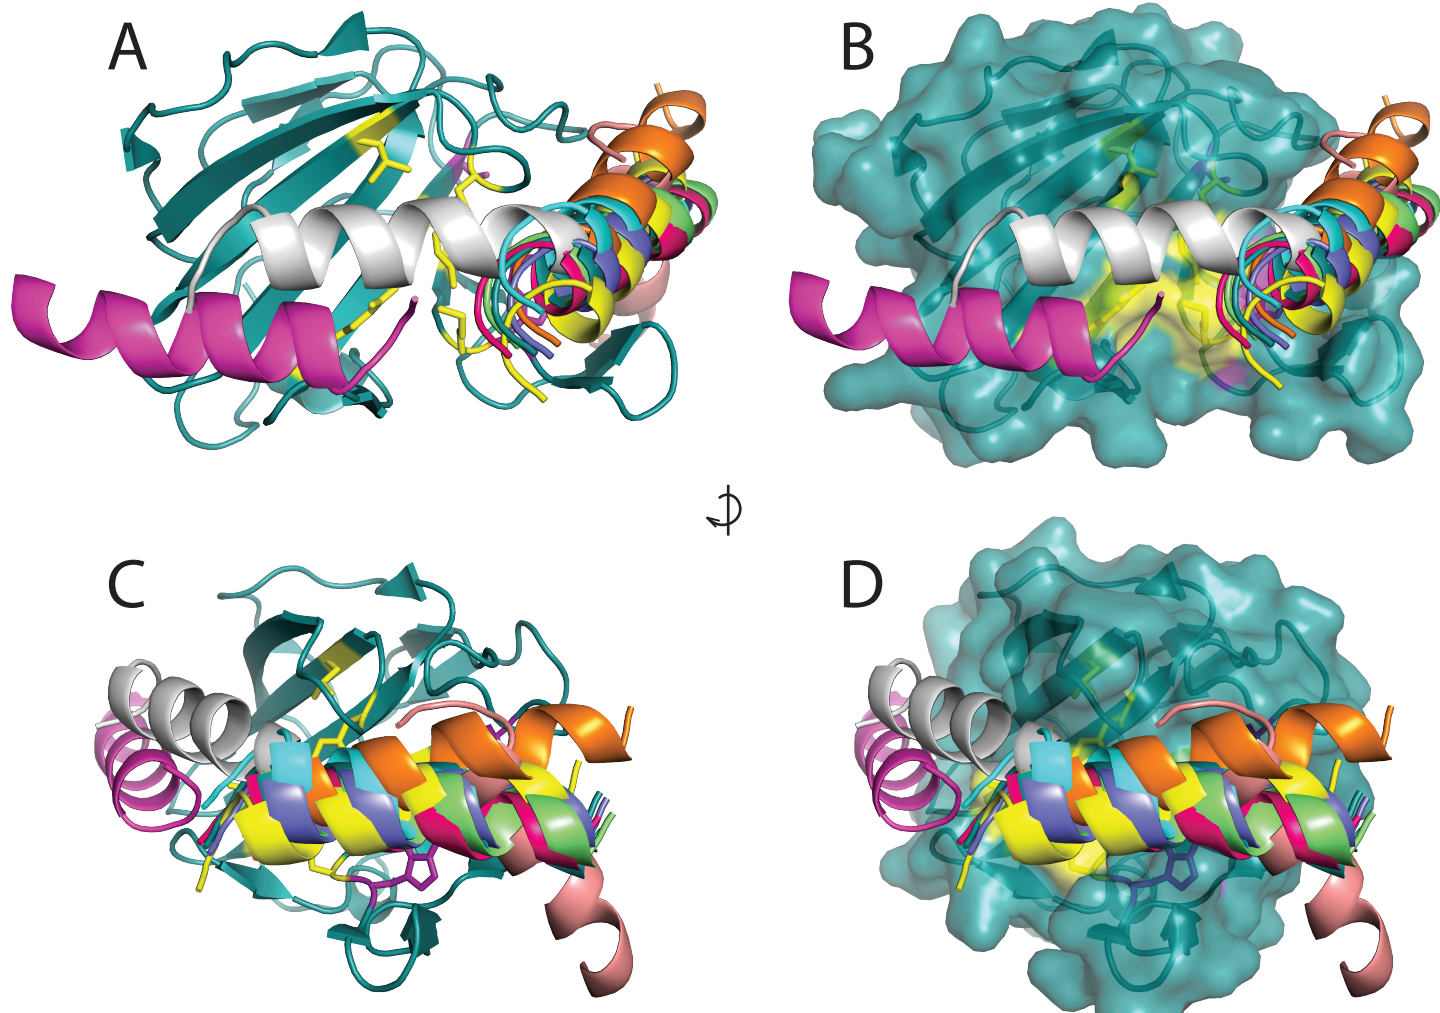

E

| Model Rank | Ele     | Desolv  | VDW    | Total   | Hb (AmiB-EnvC) |
|------------|---------|---------|--------|---------|----------------|
| 1          | -18.505 | -15.196 | 31.715 | -30.529 | 0              |
| 2          | -22.907 | -7.198  | 11.904 | -28.915 | 2              |
| 3          | -14.245 | -14.573 | 36.666 | -25.152 | 1              |
| 4          | -14.558 | -12.017 | 14.656 | -25.110 | 2              |
| 5          | -16.279 | -11.110 | 22.837 | -25.105 | 1              |
| 6          | -14.542 | -14.617 | 43.777 | -24.781 | 1              |
| 7          | -12.947 | -16.792 | 50.025 | -24.736 | 4              |
| 8          | -17.791 | -13.601 | 68.299 | -24.563 | 2              |
| 9          | -15.606 | -15.377 | 65.556 | -24.428 | 0              |
| 10         | -19.444 | -13.237 | 82.895 | -24.392 | 2              |

Figure S5
